# Supplementary material for: Lurasidone Augmentation of Clozapine in Schizophrenia—Retrospective Chart Review
Source: MDPI journal article supplement (doi:10.3390/brainsci13030445), 2023-03-04
Supplement: s1 [file s1]

## Annex 1

Data collecting form for all patients on clozapine:

| Patient code | Age | Gender | Diagnosis | Clozapine dose (mg) | Treatment schedule (1 monotherapy; 2-poliththerapy) | Other antipsychotics with dosing |
|--------------|-----|--------|-----------|---------------------|-----------------------------------------------------|----------------------------------|
|              |     |        |           |                     |                                                     |                                  |

Form for patients on clozapine and lurasidone combination:

|                                                                                                             |  |
|-------------------------------------------------------------------------------------------------------------|--|
| Case number                                                                                                 |  |
| Illness duration (in years)                                                                                 |  |
| Number of previous ineffective pharmacotherapy trials prior to the use of clozapine +lurasidone combination |  |
| Antipsychotic used in combination with clozapine prior to switch to lurasidone                              |  |
| Somatic comorbidities                                                                                       |  |
| Addictions                                                                                                  |  |
| Other psychotropic medications used at the time of adding the antipsychotic                                 |  |
| Nonpsychiatric medications (with daily doses)                                                               |  |
| Initial dose of lurasidone                                                                                  |  |
| Target dose of lurasidone                                                                                   |  |
| Duration of the combined treatment (clozapine + lurasidone), in months                                      |  |
| Clozapine dose (mg)                                                                                         |  |
| <b>Symptoms at the beginning of the combined clozapine + lurasidone treatment:</b>                          |  |
| Residual positive symptoms (1-yes; 0-no)                                                                    |  |
| Exacerbation of positive symptoms (1-yes; 0-no)                                                             |  |
| Negative symptoms (1-yes; 0-no)                                                                             |  |
| Depressive symptoms (1-yes; 0-no)                                                                           |  |
| Anxiety (1-yes; 0-no)                                                                                       |  |
| Suicidal thoughts (1-yes; 0-no)                                                                             |  |
| Cognitive dysfunctions (1-yes; 0-no)                                                                        |  |
| Sexual dysfunctions (1-yes; 0-no)                                                                           |  |
| Hyperprolactinemia (1-yes; 0-no)                                                                            |  |
| Overweight/Obesity (1-yes; 0-no)                                                                            |  |
| Disorders of glucose metabolism (1-yes; 0-no)                                                               |  |
