# Supplementary material for: Lurasidone Augmentation of Clozapine in Schizophrenia—Retrospective Chart Review
Source: MDPI journal article supplement (doi:10.3390/brainsci13030445), 2023-03-04
Supplement: s1 [file s1]

Table S1

| Case numbers                                                                                                | 1                                                                                         | 2                 | 3                 | 4               | 5                                                      | 6                 | 7                  | 8                  | 9                  | 10                 | 11                 | 12          | 13                                                                 | 14                                                                              | 15                                                                            | 16                 |
|-------------------------------------------------------------------------------------------------------------|-------------------------------------------------------------------------------------------|-------------------|-------------------|-----------------|--------------------------------------------------------|-------------------|--------------------|--------------------|--------------------|--------------------|--------------------|-------------|--------------------------------------------------------------------|---------------------------------------------------------------------------------|-------------------------------------------------------------------------------|--------------------|
| Age                                                                                                         | 27                                                                                        | 42                | 42                | 35              | 37                                                     | 45                | 40                 | 38                 | 36                 | 42                 | 28                 | 29          | 23                                                                 | 40                                                                              | 27                                                                            | 38                 |
| Sex                                                                                                         | M                                                                                         | M                 | F                 | F               | M                                                      | F                 | M                  | F                  | F                  | F                  | M                  | M           | M                                                                  | M                                                                               | M                                                                             | F                  |
| Duration of illness                                                                                         | 4                                                                                         | 22                | 13                | 12              | 18                                                     | 16                | 16                 | 10                 | 14                 | 20                 | 7                  | 3           | 7                                                                  | 16                                                                              | 1                                                                             | 12                 |
| Number of previous ineffective pharmacotherapy trials prior to the use of clozapine +lurasidone combination | 4                                                                                         | 3                 | 5                 | 6               | 3                                                      | 2                 | 7                  | 5                  | 4                  | 6                  | 7                  | 7           | 2                                                                  | 5                                                                               | 2                                                                             | 8                  |
| Dose of clozapine that was combined with lurasidone                                                         | 500mg                                                                                     | 450mg             | 325mg             | 300mg           | 300mg                                                  | 500mg             | 100 mg             | 50 mg              | 400mg              | 425 mg             | 300 mg             | 500 mg      | 375 mg                                                             | 100 mg                                                                          | 400 mg                                                                        | 200 mg             |
| Antipsychotic used in combination with clozapine prior to switch to lurasidone                              | Initially lurasidone + olanzapine, subsequent gradual switch from olanzapine to clozapine | amisulpride 300mg | amisulpride 600mg | haloperidol 3mg | risperidone 4mg                                        | amisulpride 400mg | amisulpride 600 mg | aripiprazole 15 mg | aripiprazole 30 mg | cariprazine 4,5 mg | aripiprazole 30 mg | amisulpride | aripiprazole + olanzapine prior to switch to clozapine +lurasidone | amisulpride + lurasidone (with subsequent switch from amisulpride to clozapine) | olanzapine + lurasidone (with subsequent switch from olanzapine to clozapine) | aripiprazole       |
| Somatic comorbidities                                                                                       | -                                                                                         | -                 | -                 | Hypothyroidism  | Obesity, hypercholesterolaemia, hypertension, impaired |                   | -                  | -                  | Diabetes           | -                  | -                  | -           | -                                                                  | Chronic myeloid - leukemia, hypercholesterolemia, obesity                       |                                                                               | hyperprolactinemia |

[illegible]

|                                                                      |                                                                                                                                                                               |                                                                                                                                                                                                                                                                         |                                                                                        |                                                                                                                                                                                                                                                                                                                                                |                                                                                                                                                                                                                                                                                                                                                     |                                                                                                                                                                                                               |                                                                   |                              |                                                                     |                                                                                                                                                                                                                                                               |                                                                                                                   |                                                                                                                                                                                                                                                               |                                                                                                       |                                                                                                                  |                                                                                                                                                                                                                                                                                                   |                                                                                                                                                                                                                              |
|----------------------------------------------------------------------|-------------------------------------------------------------------------------------------------------------------------------------------------------------------------------|-------------------------------------------------------------------------------------------------------------------------------------------------------------------------------------------------------------------------------------------------------------------------|----------------------------------------------------------------------------------------|------------------------------------------------------------------------------------------------------------------------------------------------------------------------------------------------------------------------------------------------------------------------------------------------------------------------------------------------|-----------------------------------------------------------------------------------------------------------------------------------------------------------------------------------------------------------------------------------------------------------------------------------------------------------------------------------------------------|---------------------------------------------------------------------------------------------------------------------------------------------------------------------------------------------------------------|-------------------------------------------------------------------|------------------------------|---------------------------------------------------------------------|---------------------------------------------------------------------------------------------------------------------------------------------------------------------------------------------------------------------------------------------------------------|-------------------------------------------------------------------------------------------------------------------|---------------------------------------------------------------------------------------------------------------------------------------------------------------------------------------------------------------------------------------------------------------|-------------------------------------------------------------------------------------------------------|------------------------------------------------------------------------------------------------------------------|---------------------------------------------------------------------------------------------------------------------------------------------------------------------------------------------------------------------------------------------------------------------------------------------------|------------------------------------------------------------------------------------------------------------------------------------------------------------------------------------------------------------------------------|
|                                                                      | 5                                                                                                                                                                             | 2                                                                                                                                                                                                                                                                       | 3                                                                                      | 1                                                                                                                                                                                                                                                                                                                                              | 4                                                                                                                                                                                                                                                                                                                                                   | 5                                                                                                                                                                                                             | 3                                                                 | 4                            | 5                                                                   | 5                                                                                                                                                                                                                                                             | 5                                                                                                                 | 5                                                                                                                                                                                                                                                             | 5                                                                                                     | 4                                                                                                                | 5                                                                                                                                                                                                                                                                                                 | 4                                                                                                                                                                                                                            |
|                                                                      | 2                                                                                                                                                                             | 1                                                                                                                                                                                                                                                                       | 1                                                                                      | 2                                                                                                                                                                                                                                                                                                                                              | 3                                                                                                                                                                                                                                                                                                                                                   | 2                                                                                                                                                                                                             | 1                                                                 | 1                            | 2                                                                   | 2                                                                                                                                                                                                                                                             | 2                                                                                                                 | 3                                                                                                                                                                                                                                                             | 2                                                                                                     | 2                                                                                                                | 2                                                                                                                                                                                                                                                                                                 | 2                                                                                                                                                                                                                            |
| Number of weeks until the observable therapeutic effect was achieved | 4                                                                                                                                                                             | 5                                                                                                                                                                                                                                                                       | 3                                                                                      | 4                                                                                                                                                                                                                                                                                                                                              | 6                                                                                                                                                                                                                                                                                                                                                   | 12                                                                                                                                                                                                            | 8                                                                 | 6                            | 8                                                                   | 4                                                                                                                                                                                                                                                             | 6                                                                                                                 | 6                                                                                                                                                                                                                                                             | 8                                                                                                     | 6                                                                                                                | 4                                                                                                                                                                                                                                                                                                 | 4                                                                                                                                                                                                                            |
| Effects of the addition of lurasidone                                | Reduction of positive symptoms, remission of anxiety, mood improvement, the patient was more eager to make social contacts and decided to start treatment in a day care unit. | Remission of sexual dysfunctions (decreased libido and erectile dysfunctions)<br><br>Remission of depressive and anxiety symptoms<br><br>Reduction in intensity of ideas of reference<br><br>Improved level of functioning.<br><br>The patient return to work activity. | further gradual improvement throughout the duration of treatment<br><br>Return to work | Complete remission after 2 months of the combined treatment (in all symptom domains)<br><br>Marked reduction of positive symptoms, greater emotional stability, decreased level of anxiety and excessive worrying, improved level of activity<br><br>Stabilisation of weight<br><br>Overall improvement in functioning and social interactions | Normalisation of prolactin, glucose and HbA1 levels<br><br>Possibility of clozapine daily dose reduction from 300 to 225 mg<br><br>Weight reduction (from 145 to 134 kg for 5 weeks)<br><br>After 10 months recurrence of depressive symptoms – treated with 60 mg of duloxetine, without worsening of positive symptoms<br><br>Partial improvement | Improved: emotional reactivity, psychomotor drive, motivation to pursue activities, spontaneity<br><br>Overall improvement in functioning and social interaction<br><br>Normalisation of the prolactin level. | Significant improvement, less anxiety, the patient return to work | Significant mood improvement | Improvement in mood, level of activity, intensity of hallucinations | Improvement in affective symptoms, better modulation of affect, significant reduction of positive symptoms (delusions and hallucinations) , improved level of functioning – the patient was planning to return to work, ws more eager to make social contacts | Significant reduction of positive symptoms and anxiety. The patient decided to start treatment in a day care unit | Moderate improvement of positive symptoms and level of activity (the patient was more willing to participate in ward activities, made contacts with other patients).<br><br>Due to extrapyramidal symptoms (tremor in upper limbs) lurasidone was discontinue | Improvement in mood, reduction of positive symptoms, decreased level of anxiety, more social contacts | Reduction of frequency and intensity of positive symptoms, improved level of social and occupational functioning | Improvement in mood, reduction of positive symptoms and anxiety, remission of suicidal thoughts and behaviours<br><br>After 3 months of treatment the patient discontinued the medications, consulting it with his doctor (the patient presented little insight in the disease and his symptoms). | Significant reduction of positive symptoms and anxiety level, improved level of functioning<br><br>Due to the symptomatic hyperprolactinemia (with galactorrhoea)' lurasidone was discontinued and switched to aripiprazole. |

of sexual  
functions

Weight  
reduction  
(from 144 to  
121 kg)

---
